# Supplementary material for: (NH 4 ) 2 HPO 4 -mediated closed-pore/pseudographite synergy in thin-walled hard carbon for enhanced Na + storage and kinetics
Source: Royal Society of Chemistry journal article supplement (doi:10.1039/d5ta02820e), 2025-01-01
Supplement: d5ta02820e1.pdf [file d5ta02820e1.pdf]

Supporting information

**(NH<sub>4</sub>)<sub>2</sub>HPO<sub>4</sub>-mediated closed-pore/pseudographite synergy in thin-walled hard carbon for enhanced Na<sup>+</sup> storage and kinetics**

Yatao Chang <sup>a,1</sup>, Zhengpeng Yang <sup>a,1</sup>, Yufang Cao <sup>b,1,\*</sup>, Zhao He <sup>c,d</sup>, Huili Fu <sup>b</sup>, Tongtong Qin <sup>b</sup>, Liming Zhao <sup>b,\*</sup>, Yongyi Zhang <sup>b,c,\*</sup>

<sup>a</sup> School of Materials Science and Engineering, Henan Polytechnic University, Jiaozuo 454003, China

<sup>b</sup> Key Laboratory of Multifunctional Nanomaterials and Smart Systems, Suzhou Institute of Nano-Tech and Nano-Bionics, Chinese Academy of Sciences, Suzhou 215123, China

<sup>c</sup> Division of Nanomaterials and Jiangxi Key Lab of Carbonene Materials, Jiangxi Institute of Nanotechnology, Nanchang 330200, China

<sup>d</sup> College of Chemistry and Chemical Engineering, Nanchang University, 999 Xue fu Avenue, Nanchang 330031, China

\* Corresponding authors at: Suzhou Institute of Nano-Tech and Nano-Bionics, Chinese Academy of Sciences, Suzhou 215123, PR China.

*E-mail addresses:* yfcao2019@sinano.ac.cn (Y. Cao), lmzhao2019@sinano.ac.cn (L. Zhao), yyzhang2011@sinano.ac.cn (Y. Zhang).

<sup>1</sup> These authors contributed equally to this work.

## Computational Details

All the DFT calculations in our work were performed by the Vienna ab initio simulation package (VASP) [1]. The generalized gradient approximation (GGA) with the Perdew-Burke-Ernzerhof (PBE) functional were used to describe the electronic exchange and correlation effects [2-4]. Uniform G-centered k-points meshes with a resolution of  $2\pi \times 0.04 \text{ \AA}^{-1}$  and Methfessel-Paxton electronic smearing were adopted for the integration in the Brillouin zone for geometric optimization. The simulation was run with a cutoff energy of 500 eV throughout the computations. The geometry optimization was considered convergent when the electronic energy and Hellmann-Feynman forces convergence criterion was smaller than  $10^{-5}$  eV and  $0.05 \text{ eV \AA}^{-1}$ , respectively. Van der Waals dispersion corrections were treated by the Grimme DFT-D3 method [5-6]. We carried out the potential energy diffusion pathway and minimum diffusion energy barrier of Na on all related graphene systems with the climbing image nudged elastic band (CI-NEB) method, [7] which was implemented in VASP. The method involves optimizing a chain of images which is connecting the initial and final states, and each image of the reaction path can move only in the perpendicular direction.

## References

- [1] G. Kresse and J. Furthmuller, Comput. Mater. Sci., 1996, 6, 15-50.
- [2] J. P. Perdew, K. Burke and M. Ernzerhof, Phys. Rev. Lett., 1996, 77, 3865-3868.
- [3] P. E. Blöchl, Matter Mater. Phys., 1994, 50, 17953-17979.
- [4] G. Kresse and D. Joubert, Matter Mater. Phys., 1999, 59, 1758.
- [5] S. Grimme, J. Comput. Chem. 2006, 27, 1787-1799.
- [6] S. Grimme, J. Antony, S. Ehrlich and H. Krieg, J. Chem. Phys. 2010, 132, 15410.
- [7] G. Henkelman, B. P. Uberuaga and H. Jonsson, J. Chem. Phys. 2000, 113, 9901.

## Supplementary Figures

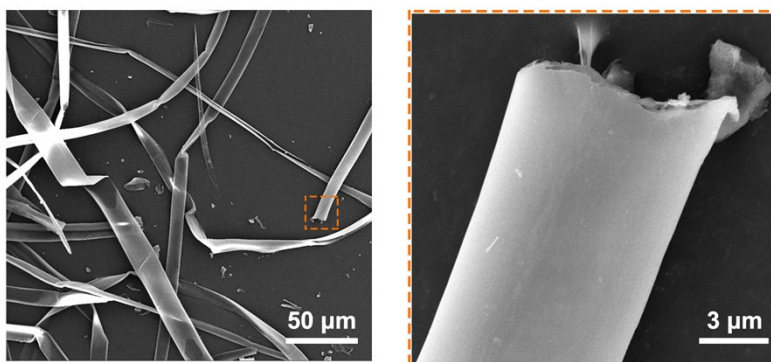

**Fig. S1** SEM images of CKF.

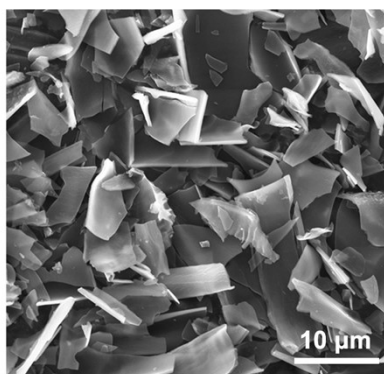

**Fig. S2** SEM image of DAP-OKF.

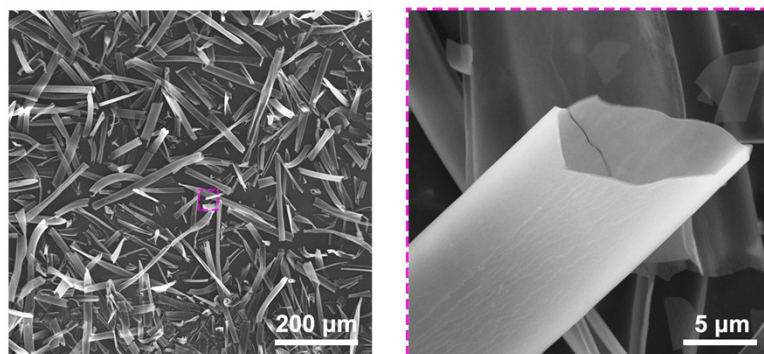

**Fig. S3** SEM images of OKF.

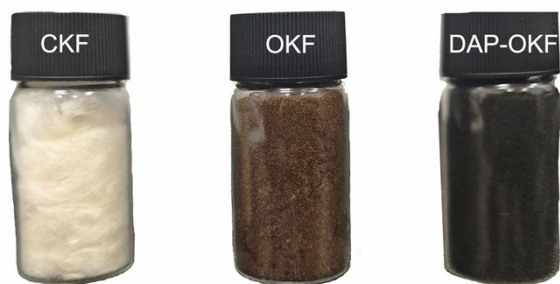

**Fig. S4** Photographs of CKF, OKF and DAP-OKF.

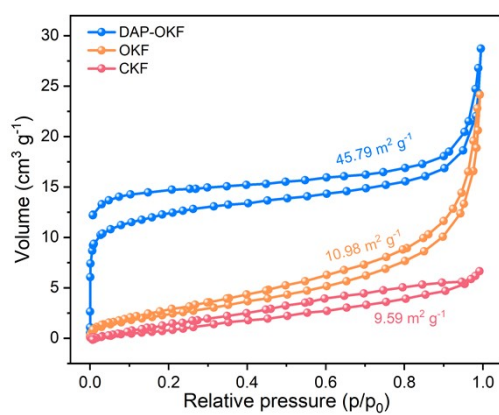

**Fig. S5** N<sub>2</sub> adsorption/desorption isotherms of DAP-OKF, OKF and CKF.

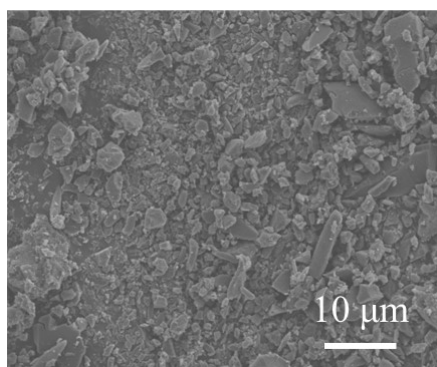

**Fig. S6** SEM images of PKF.

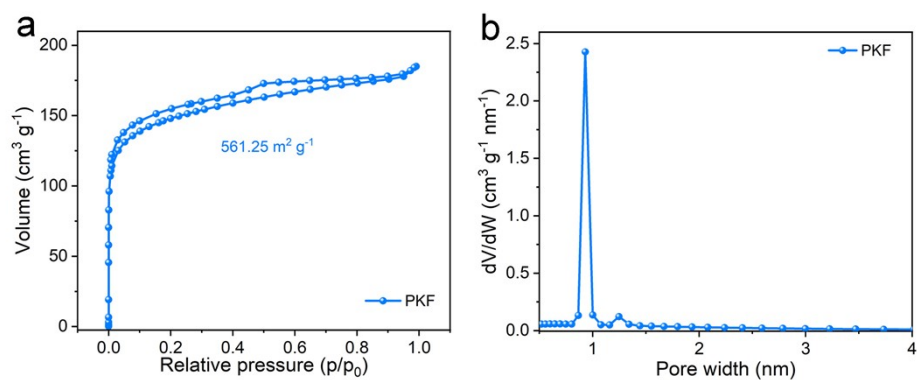

**Fig. S7** (a) N<sub>2</sub> adsorption-desorption isothermal curves and (b) pore size distributions of PKF.

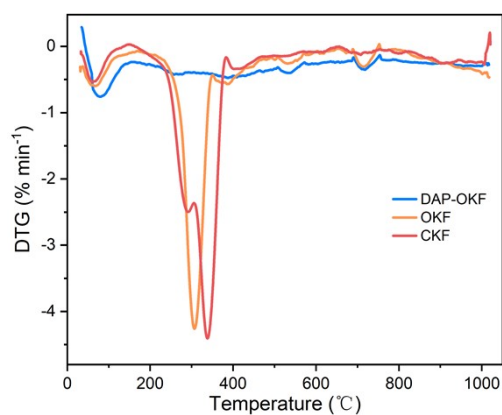

**Fig. S8** DTG curves of DAP-OKF, OKF and CKF.

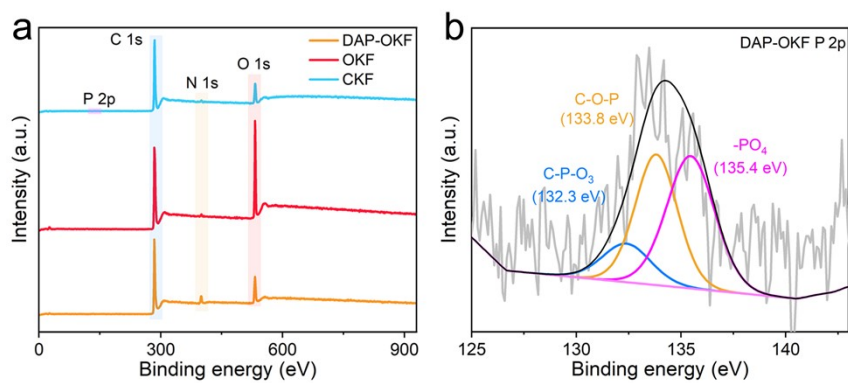

**Fig. S9** (a) XPS spectra of DAP-OKF, OKF and CKF. (b) High-resolution P 2p spectrum of DAP-OKF.

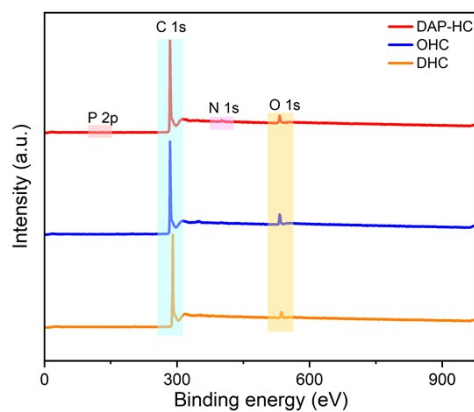

**Fig. S10** XPS spectra of DAP-HC, OHC and DHC.

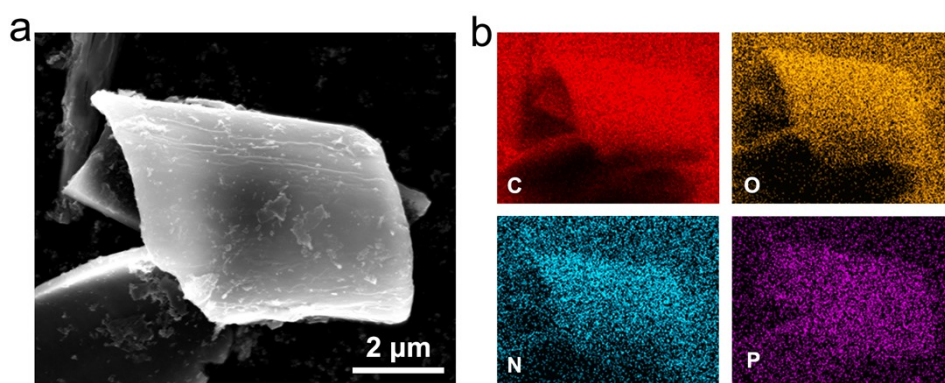

**Fig. S11** SEM image of DAP-HC and its EDS element mappings of C, O, N and P.

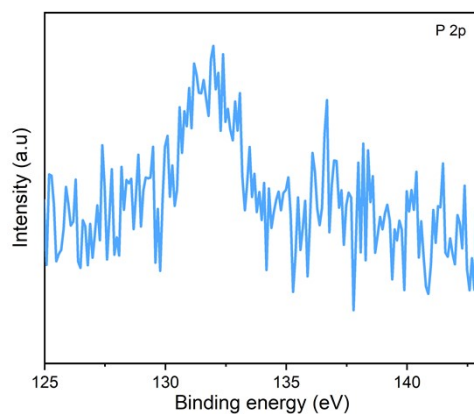

**Fig. S12** High-resolution P 2p spectrum (C-P-C) of DAP-HC.

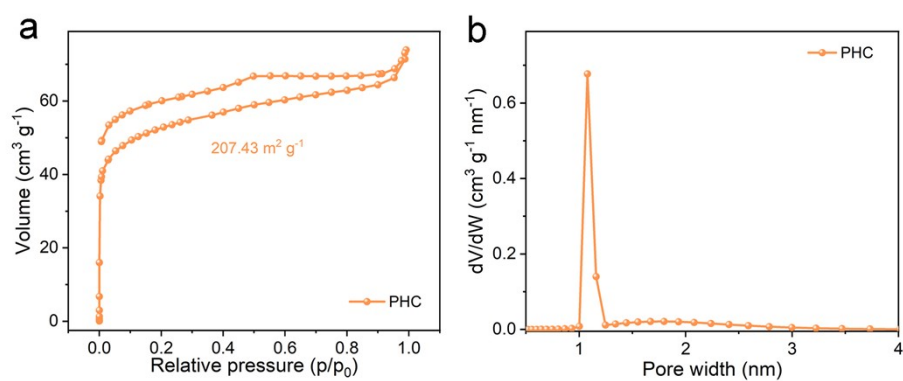

**Fig. S13** (a)  $N_2$  adsorption-desorption isothermal curves and (b) pore size distributions of PHC.

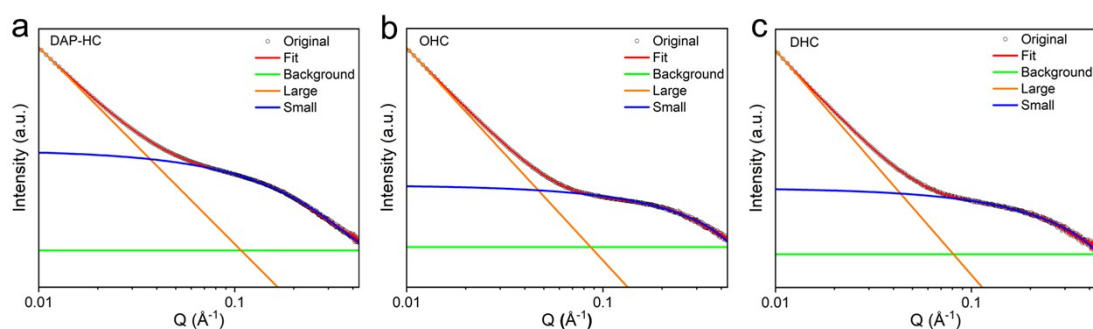

**Fig. S14** Fitted SAXS patterns of DAP-HC (a), OHC (b) and DHC (c).

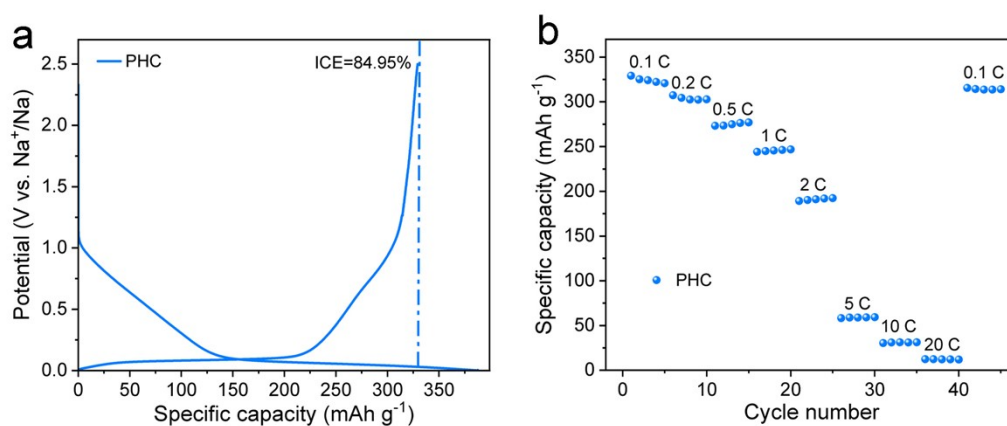

**Fig. S15** (a) Initial GCD curves at 0.1 C of PHC. (b) Rate performance at various current rates.

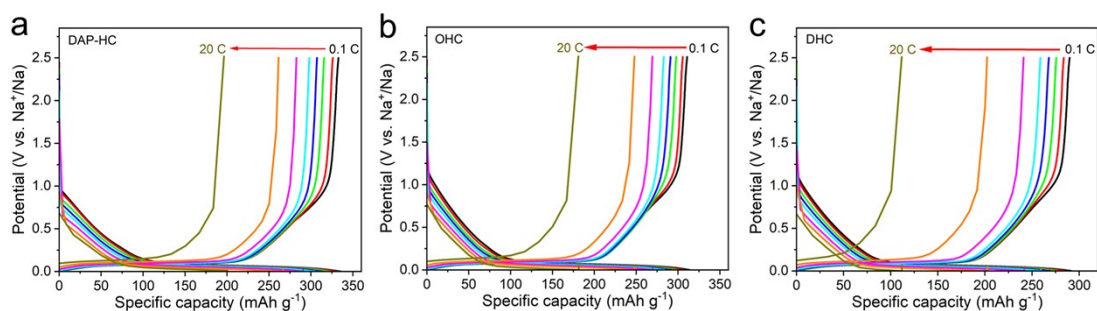

**Fig. S16** GCD curves of DAP-HC (a), OHC (b) and DHC (c) anodes at 0.1 C, 0.2 C, 0.5 C, 1 C, 2 C, 5 C, 10 C and 20 C.

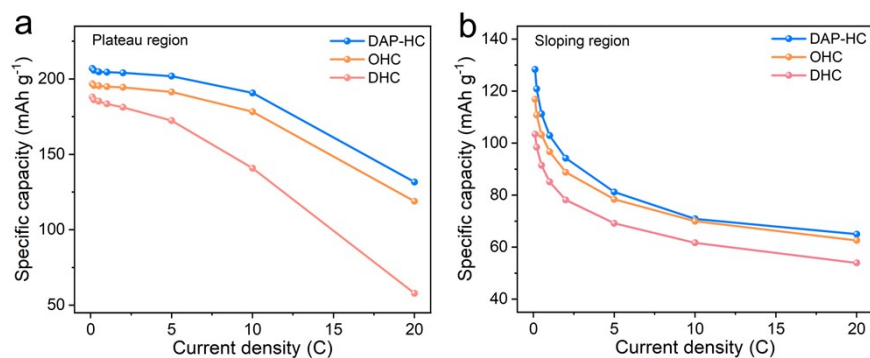

**Fig. S17** Plateau (a) and slope (b) capacities of DAP-HC, OHC and DHC at different current densities.

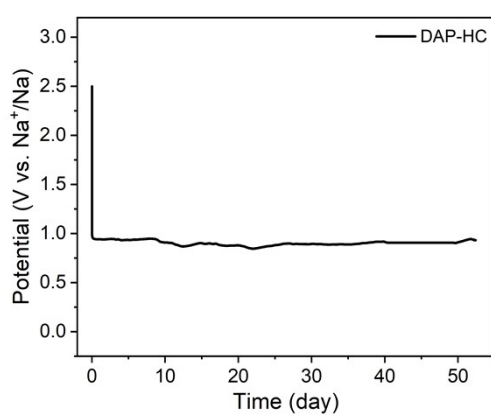

**Fig. S18** Self-discharging curves of the open-circuit voltage changes over time for DAP-HC.



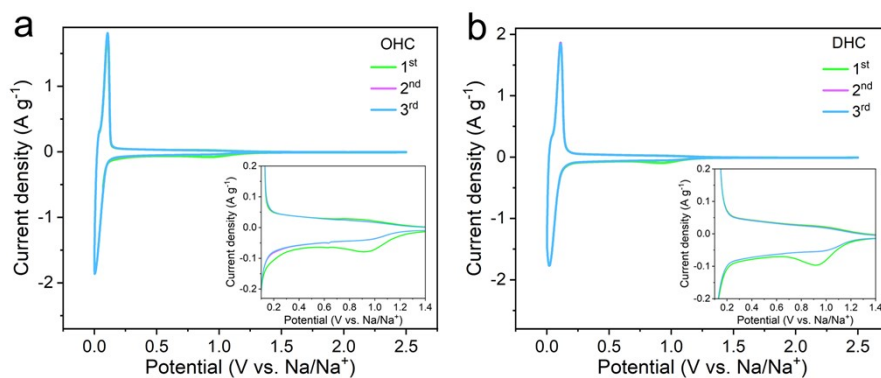

**Fig. S19** CV curves of OHC (a) and DHC (b) anodes at  $0.2 \text{ mV s}^{-1}$ .

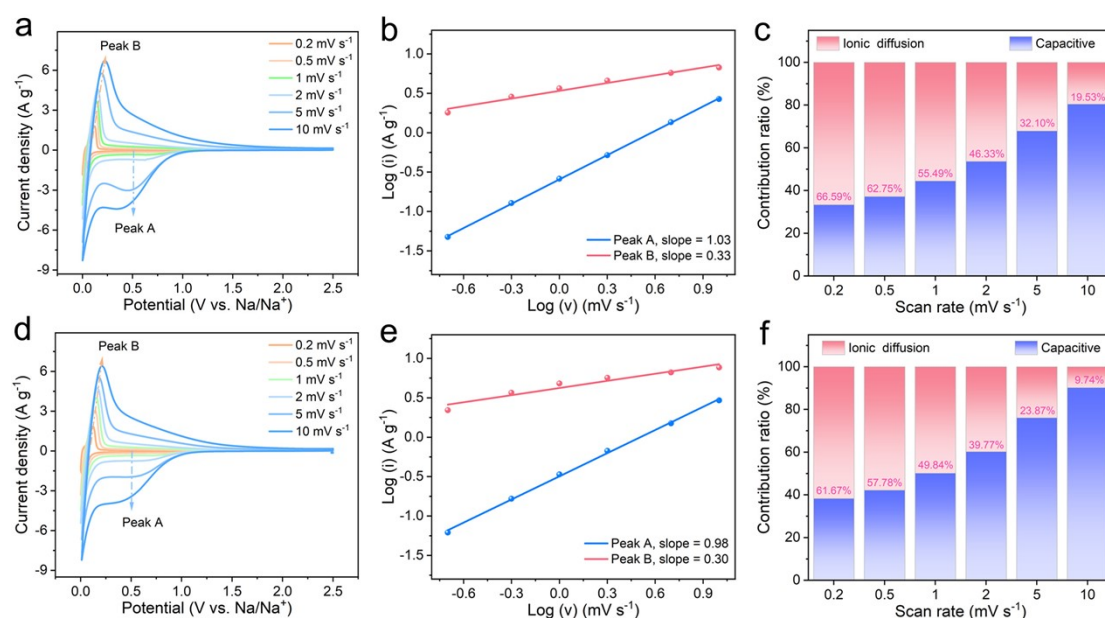

**Fig. S20** Kinetic analyses of OHC and DHC anodes for sodium-ion batteries. (a) CV curves of OHC at various scan rates and the corresponding correlations between peak current ( $i$ ) and scan rate ( $v$ ) at peak A and peak B (b). (c) Capacitive contribution percentage of OHC at various scan rates. (d) CV curves of DHC at various scan rates and the corresponding correlations between peak current ( $i$ ) and scan rate ( $v$ ) at peak A and peak B (e). (f) Capacitive contribution percentage of DHC at various scan rates.

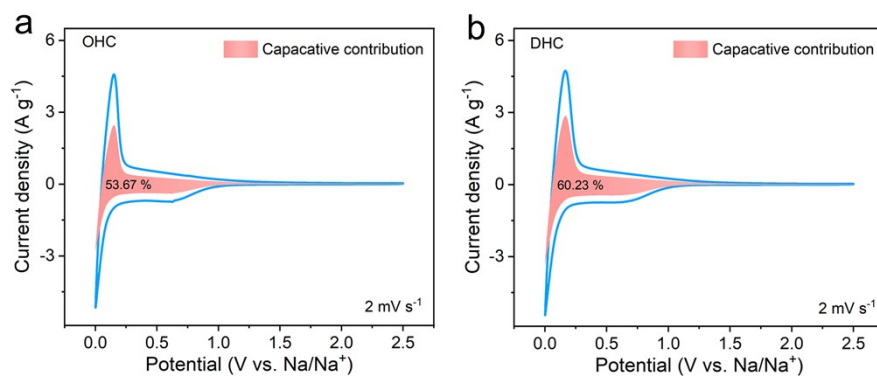

**Fig. S21** CV curves of OHC (a) and DHC (b) anodes with a calculated capacitive contribution at  $2 \text{ mV s}^{-1}$ .

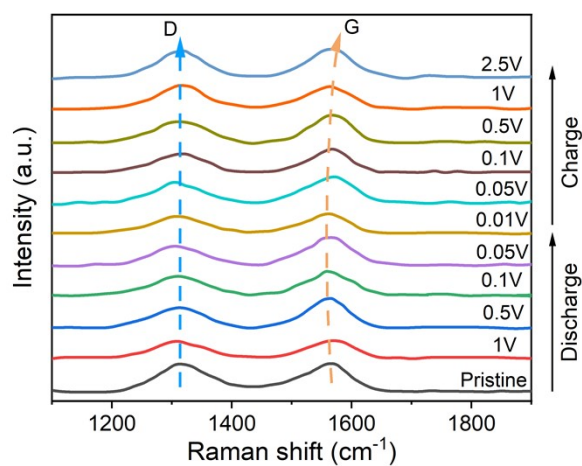

**Fig. S22** In-situ Raman spectra of DAP-HC as SIB anodes.

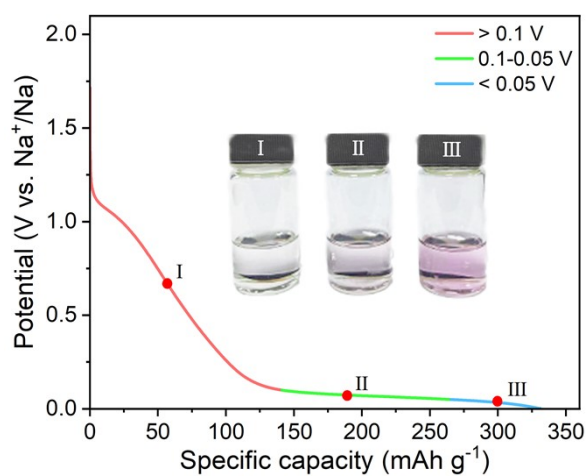

**Fig. S23** Optical photographs of electrodes at different discharge stages soaked in an ethanol solution containing phenolphthalein.

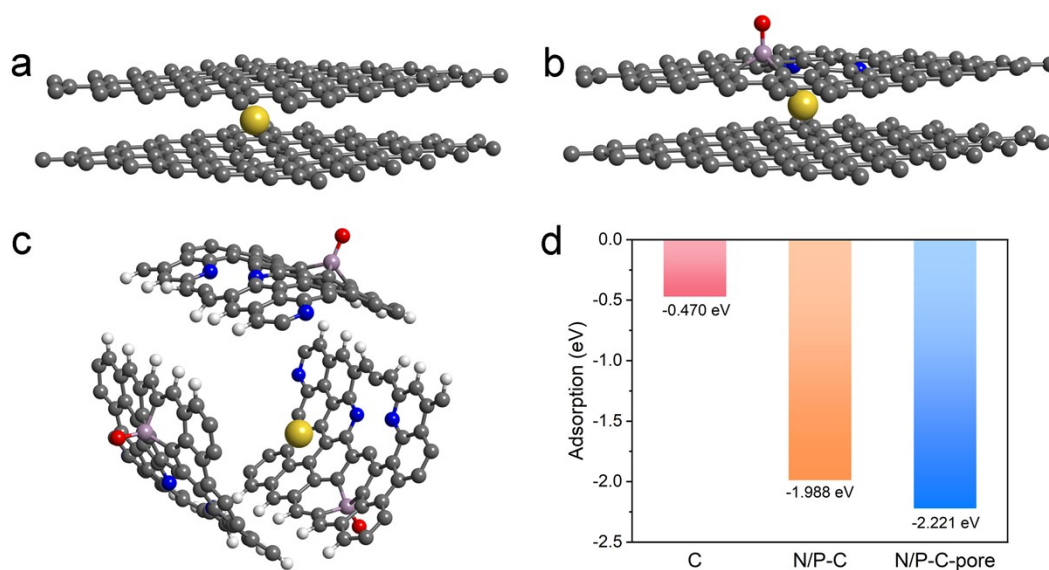

**Fig. S24** Optimized configurations of Na adsorbed on different carbon sheets: (a) pristine graphitic layer, (b) N/P co-doped graphitic layer, (c) the closed pore structural model formed by N/P co-doped graphitic layer. (d) Comparison of calculated adsorption energy for Na<sup>+</sup>. C: black, N: blue, O: red, H: white, P: purple.

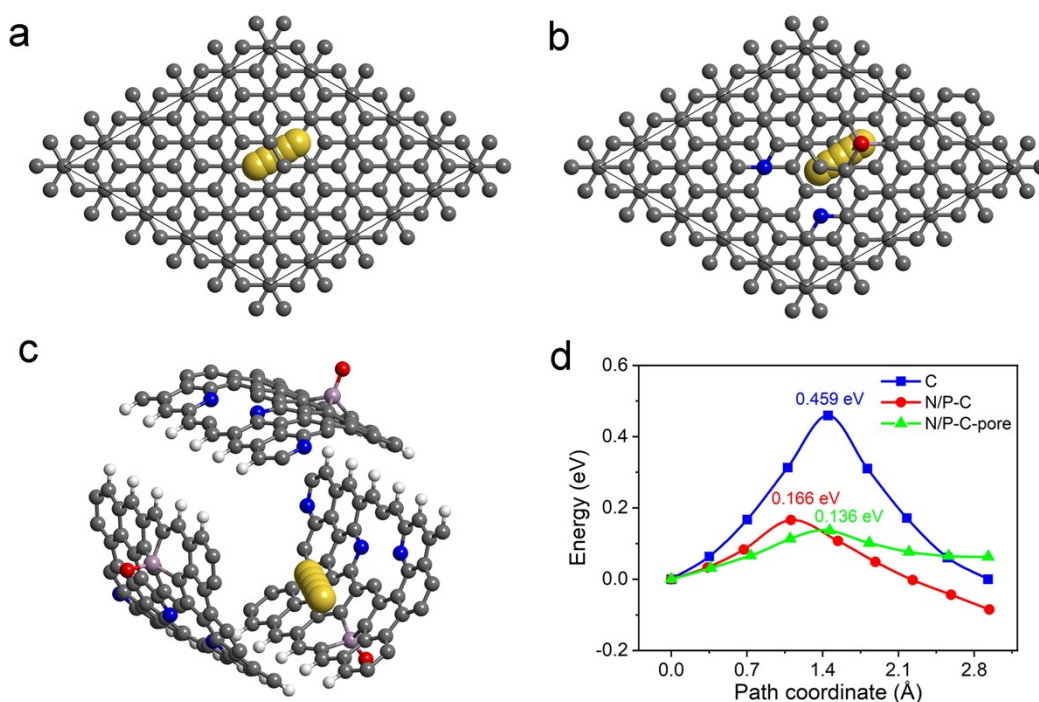

**Fig. S25** DFT models for Na<sup>+</sup> diffusion pathways of (a) pristine graphitic layer, (b) N/P co-doped graphitic layer, (c) the closed pore structural model formed by N/P co-doped

graphitic layer. (d) Potential barrier energy for Na<sup>+</sup> at different models. C: black, N: blue, O: red, H: white, P: purple.

## Supplementary Tables

**Table S1** Structural parameters estimated from N<sub>2</sub> adsorption-desorption results.

| Samples | N <sub>2</sub> adsorption                          |                                                      |
|---------|----------------------------------------------------|------------------------------------------------------|
|         | S <sub>BET</sub> (m <sup>2</sup> g <sup>-1</sup> ) | V <sub>pore</sub> (cm <sup>3</sup> g <sup>-1</sup> ) |
| DAP-OKF | 45.79                                              | 0.3485                                               |
| OKF     | 10.98                                              | 0.0506                                               |
| CKF     | 9.59                                               | 0.0109                                               |

**Table S2** Elemental analysis and XPS analysis-C 1s of DAP-OKF, OKF and CKF.

| Samples | Elemental analysis (at.%) |       |      |      | XPS analysis-C 1s (at.%) |                    |         |      |       |
|---------|---------------------------|-------|------|------|--------------------------|--------------------|---------|------|-------|
|         | C                         | O     | N    | P    | sp <sup>2</sup> -C       | sp <sup>3</sup> -C | C-O/C-N | C=O  | O-C=O |
| DAP-OKF | 79.36                     | 13.80 | 6.41 | 0.43 | 21.17                    | 47.15              | 16.46   | 9.89 | 5.33  |
| OKF     | 72.07                     | 26.55 | 1.38 |      | 17.86                    | 51.20              | 18.28   | 7.74 | 4.92  |
| CKF     | 85.65                     | 12.06 | 2.29 |      | 15.51                    | 62.36              | 12.65   | 6.00 | 3.48  |

**Table S3** Fitted values from the Porod plot of SAXS data.

|        | A                   | B                   | a    | a <sub>1</sub> | R (nm) |
|--------|---------------------|---------------------|------|----------------|--------|
| DAP-HC | 5.62E <sup>-7</sup> | 3.58E <sup>-4</sup> | 4.17 | 5.94           | 1.88   |
| OHC    | 1.56E <sup>-7</sup> | 3.52E <sup>-4</sup> | 4.36 | 3.27           | 1.03   |
| DHC    | 7.79E <sup>-8</sup> | 3.33E <sup>-4</sup> | 4.35 | 3.65           | 1.15   |
